# Supplementary material for: Chronic Intake of Energy Drinks and Their Sugar Free Substitution Similarly Promotes Metabolic Syndrome
Source: MDPI journal article supplement (doi:10.3390/nu13041202), 2021-04-06

# Chronic Intake of Energy Drinks and Their Sugar Free Substitution Similarly Promotes Metabolic Syndrome

Supplementary material:

Figure 1. Diet and drink consumption over the course of the study.

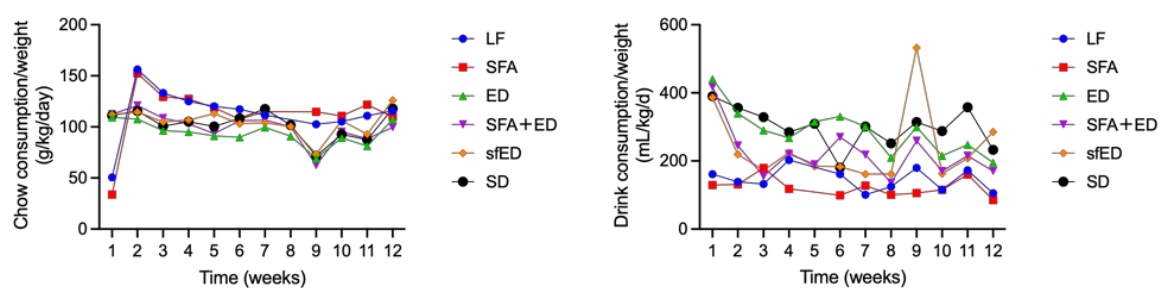

Supplement: s1 [file s1]
